# Supplementary material
Source: publisher figshare collection journal article supplement (https://acs.figshare.com/ndownloader/files/12761216)
Supplement: Supplementary file 1 [file 12761216]

## Supporting Information

# Anomalous Cooling Rate-Dependent Charge Transport in Electrolyte-Gated Rubrene Crystals

*Xinglong Ren, C. Daniel Frisbie\*, and Chris Leighton\**

Department of Chemical Engineering and Materials Science, University of Minnesota,

Minneapolis, MN 55455, USA

### 1. Typical transfer curve and induced charge density in a rubrene EGT

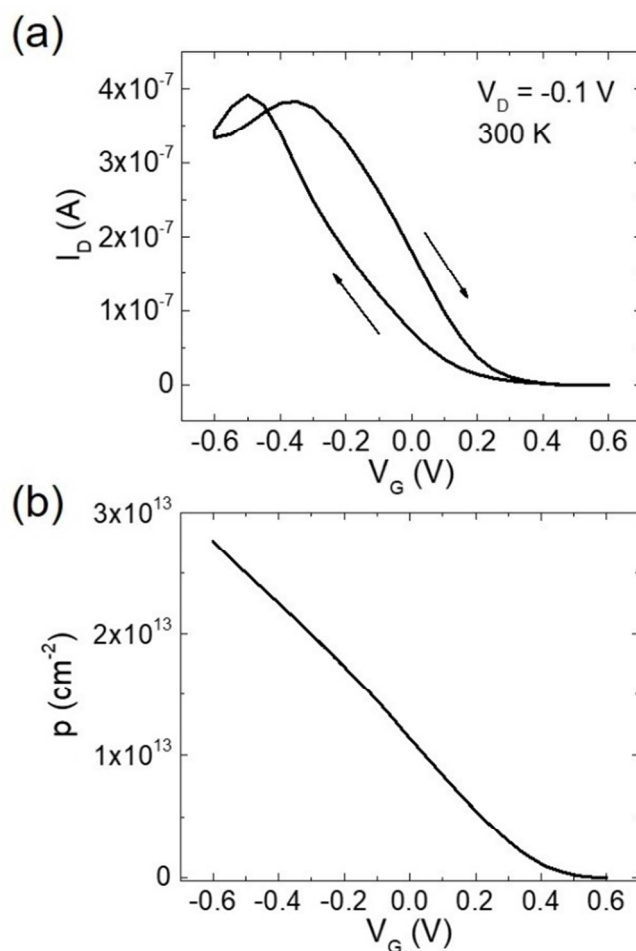

**Figure S1.** (a) Typical 300 K transfer curve for a rubrene EGT at a sweep rate of 50 mV/s. Device dimensions:  $L = 300 \mu\text{m}$ ,  $W = 340 \mu\text{m}$ . (b)  $V_G$ -dependent hole density for the same device, as determined from gate displacement current measurements.

## 2. Verification of temperature dependence from Zabdorskii plots

To describe  $R$ - $T$  characteristics, a reduced activation energy ( $W$ ) as a logarithmic derivative of  $R(T)$  can be defined as:

$$W = -\frac{d(\ln R)}{d(\ln T)}$$

If  $R(T)$  follows a thermally-activated  $T$ -dependence of the form  $R \propto \exp(T_0/T)^n$ , the reduced activation energy then becomes:

$$\ln W = A - n \ln T$$

where  $A$  is a constant. The values of  $n$  are then determined from the slopes of Zabdorskii plots, *i.e.*, plots of  $\ln W$ - $\ln T$ .

If  $R(T)$  follows a power law  $T$  dependence, on the other hand, of the form  $R \propto T^{-m}$ , then  $W$  becomes a constant ( $W = m$ ), such that  $\ln W$ - $\ln T$  plots should have zero slope.

In the context of the above, consider the data shown in Figure S2 below. For  $V_G = -0.5$  V,  $-1$  V, and  $-1.5$  V, reasonable adherence to thermally-activated behavior is observed, *i.e.*, the  $\ln W$ - $\ln T$  plots are reasonably close to straight lines with clearly negative slopes in the low  $T$  limit. For the other 3 curves, however, at  $V_G = -2$  V,  $-2.5$  V and  $-3$  V, zero slope is observed over a significant  $T$  range, evidencing power-law behavior. These conclusions are supported by Arrhenius fitting and log-log fitting as in Figure 1 in the main article. Note that at higher temperatures, negative values of  $\ln W$  are obtained in Figure S2, evidencing non-exponential, weak temperature dependence, with positive temperature coefficient of resistance.

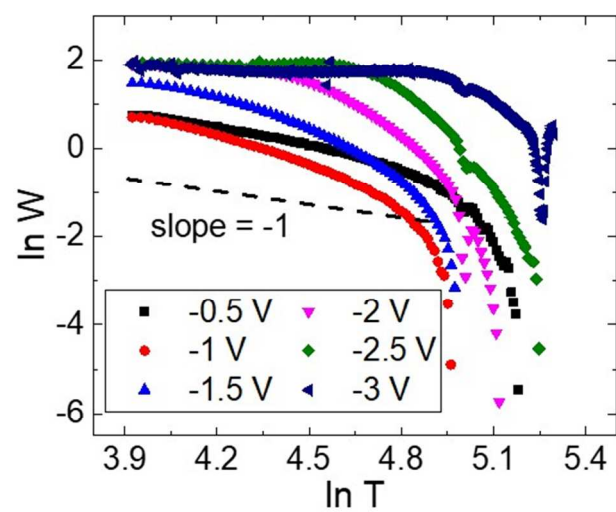

**Figure S2.**  $\ln W$ - $\ln T$  plots for the data shown in Figure 1d.

### 3. Differential scanning calorimetry (DSC)

Differential scanning calorimetry measurements were carried out using a TA Instruments Q1000 DSC with liquid nitrogen cooling capability. A sample of 5–10 mg was contained in a hermetically sealed aluminum pan. Data were acquired during cooling, on the first cooling and heating cycle performed, at 1 K/min and 10 K/min.

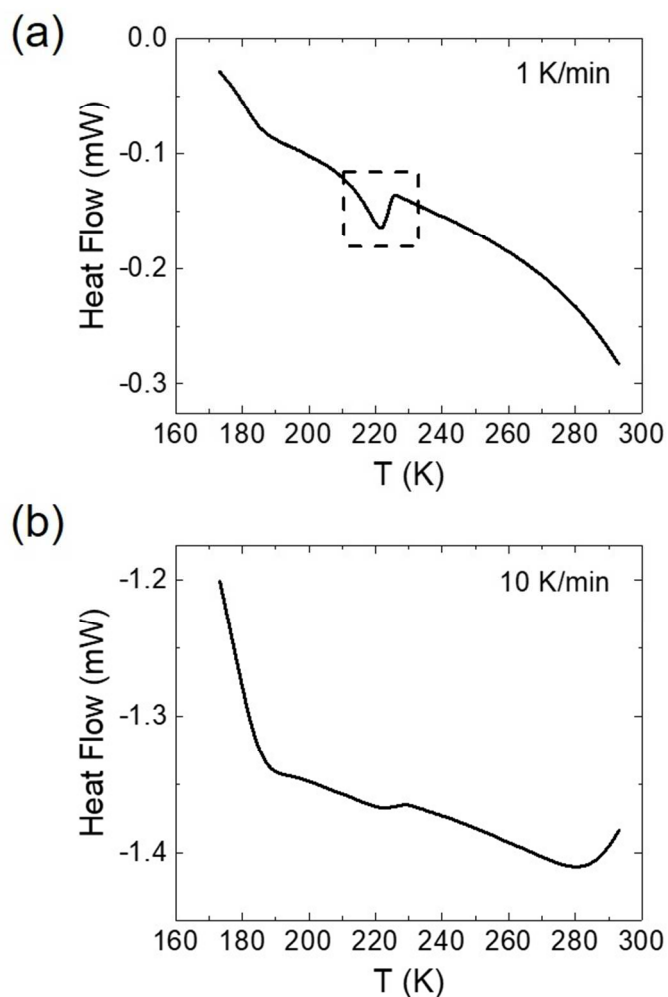

**Figure S3.** DSC data on [P14][FAP] taken during cooling at different cooling rates: (a) 1 K/min and (b) 10 K/min. A crystallization peak is observed at 1 K/min, but it does not show up at 10 K/min.

#### 4. Freezing point of [P14][FAP] and fast quenching across the freezing point

The following transport experiment was also used to determine the freezing point of [P14][FAP]. A negative  $V_G$  (-2.5 V) was first applied at 240 K, then a device was cooled to 200 K and  $V_G$  was changed to 0 at 200 K. No change in resistance was observed after changing  $V_G$  since the IL was frozen and the charge carriers were “locked” in the channel by frozen ions. Next, the device was slowly warmed up at 1 K/min, and  $R$ - $T$  was monitored (Figure S4a). A sharp increase in resistance was observed at  $\sim 215$  K, suggesting that the IL ions became mobile (*i.e.*, the IL melted) and the charge density in the channel was significantly reduced (Figure S4a).

An additional  $R$ - $T$  curve was also obtained by fast quenching across the freezing point followed by slow cooling (Figure S4b). After collecting  $R$ - $T$  data at cooling rates of 1 K/min (line A) and 10 K/min (line B), we quenched the device from 240 K to 200 K at 10 K/min, and then changed the cooling rate to 1 K/min (line C). Clearly, line B and line C overlap, demonstrating that changing the cooling rate does not make a difference when the ions in the IL are no longer mobile.

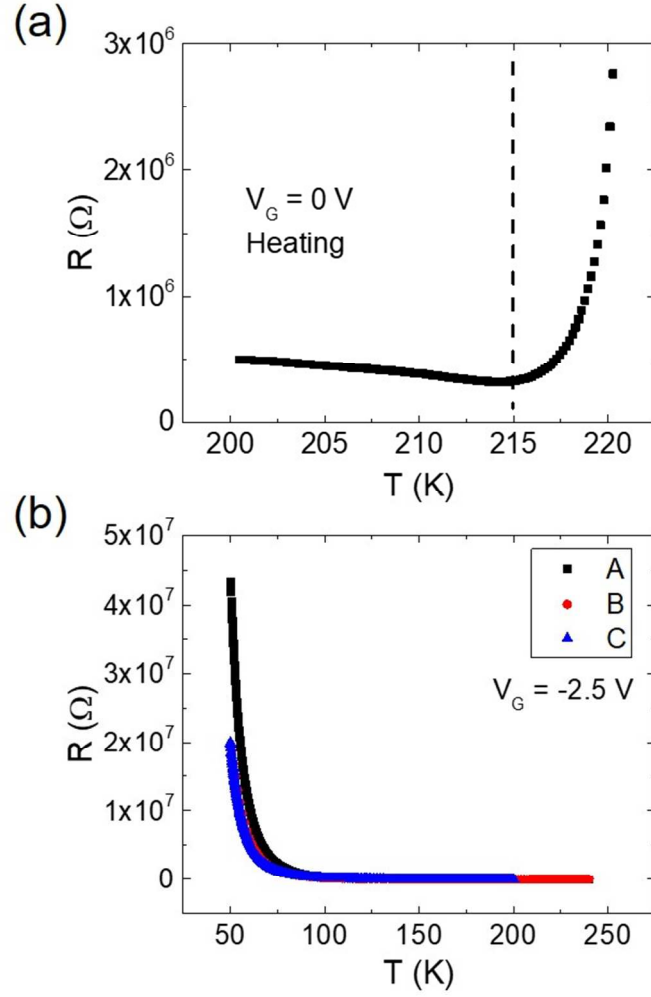

**Figure S4.** (a)  $R$ - $T$  data taken during heating (1 K/min) after changing  $V_G$  from -2.5 V to 0 V at 200 K. An increase in resistance upon heating across  $\sim 215$  K represents the melting of IL. (b)  $R$ - $T$  data of the same device taken at different cooling conditions: 1 K/min from 240 K to 50 K (A), 10 K/min from 240 K to 50 K (B), 10 K/min from 240 K to 200 K and then 1 K/min to 50 K (C). Line B and line C match very well.

## 5. Changing the cooling rate across $T^*$

First,  $R$ - $T$  data at 1 K/min and 10 K/min were collected and the ratio  $R_{\text{slow}}/R_{\text{fast}}$  was plotted as a function of  $T$  (Figure 4 in the main article). Based on such data, the temperature  $T^*$  is defined. The following measurements were then performed at  $T \leq 200$  K, *i.e.*, with the IL in the solid state. The device was first quenched from 200 K to a desired temperature (180 K, 120 K, or 70 K) at 10 K/min, and then the cooling rate was changed to 1 K/min while the  $R$ - $T$  relationship was recorded (Figure S5). The 3 curves in Figure S5 overlap with each other, indicating that, once cooled below the IL freezing point, cooling rate across  $T^*$  has little influence on  $R$ - $T$ .

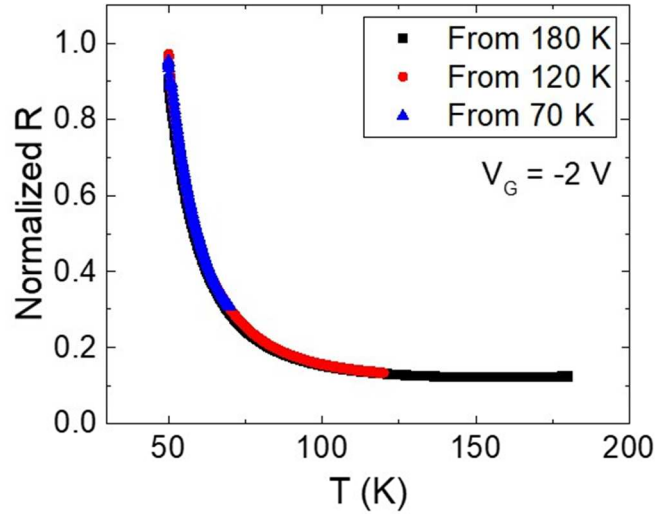

**Figure S5.** Slow-cooling resistance normalized by  $R_{\text{fast}}$  (50 K) for the same device in Figure 4 after quenching from 200 K to different start temperatures: 180 K, 120 K, and 70 K. The 3 curves overlap very well.
